# Supplementary material for: Luminescent nucleotide/Tb3+ coordination polymer for Fe(ii) detection in human serum
Source: Royal Society of Chemistry journal article supplement (doi:10.1039/c9ay02585e), 2020-01-01
Supplement: c9ay02585e1.pdf [file c9ay02585e1.pdf]

Supplementary Information

Luminescent nucleotide/Tb<sup>3+</sup> coordination polymer for Fe(II) detection in  
human serum

**Yan Liu<sup>a</sup>, Lu-Lu Peng<sup>a</sup>, Wei-Xiong Huang<sup>a</sup>, Hui-Zhuo Zhou<sup>a</sup>, Li Xu<sup>a,\*</sup>**

*<sup>a</sup>School of Chemistry and Chemical Engineering, Guangdong Pharmaceutical  
University, Zhongshan, 528458, P. R. China*

E-mail: [xuli473@163.com](mailto:xuli473@163.com)(L. Xu)

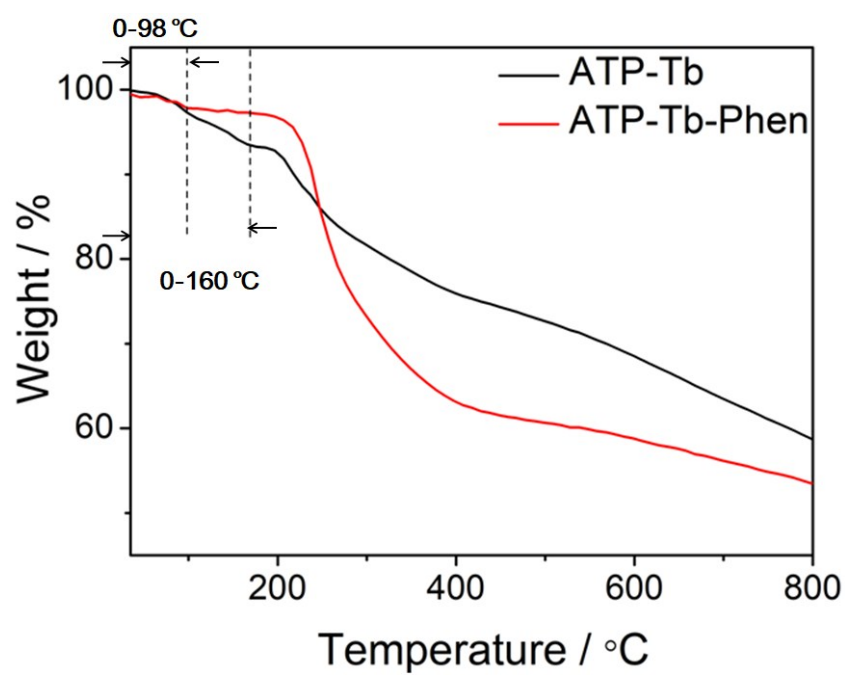

Figure S1. TGA curves of ATP-Tb CP and ATP-Tb-Phen CP.

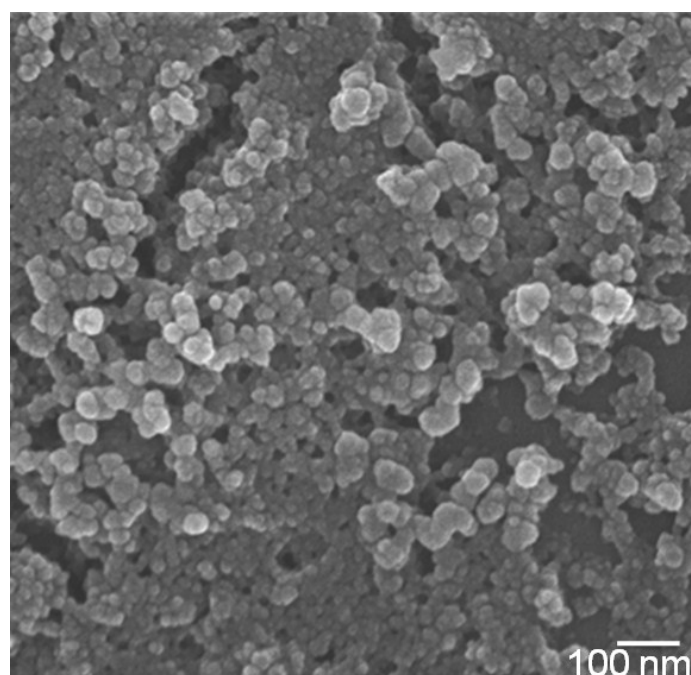

Figure S2. SEM image of ATP-Tb CP.

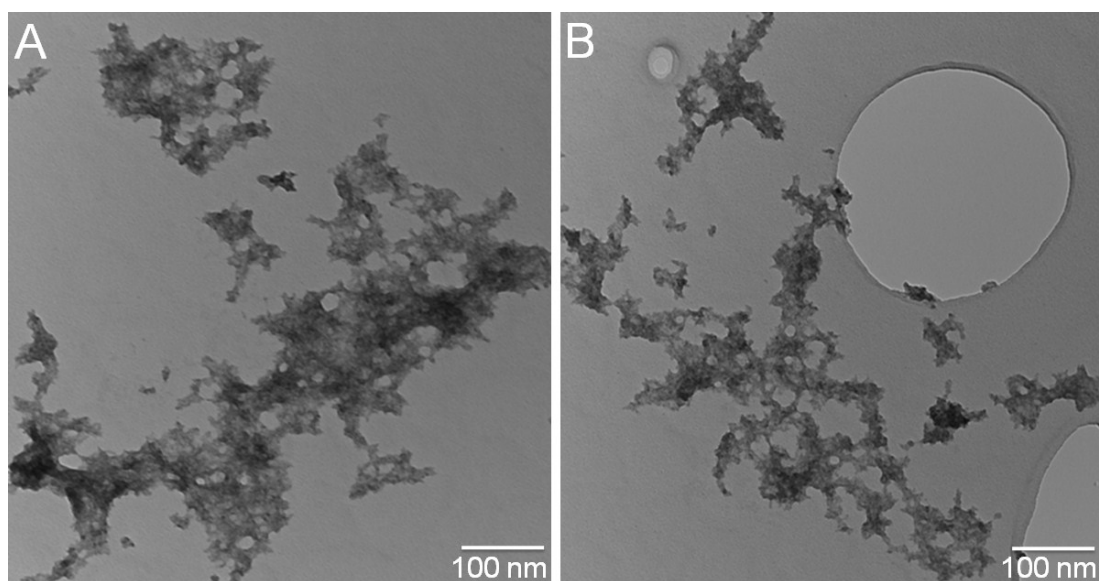

**Figure S3.** TEM images of ATP-Tb-Phen CP (A) and ATP-Tb CP (B).

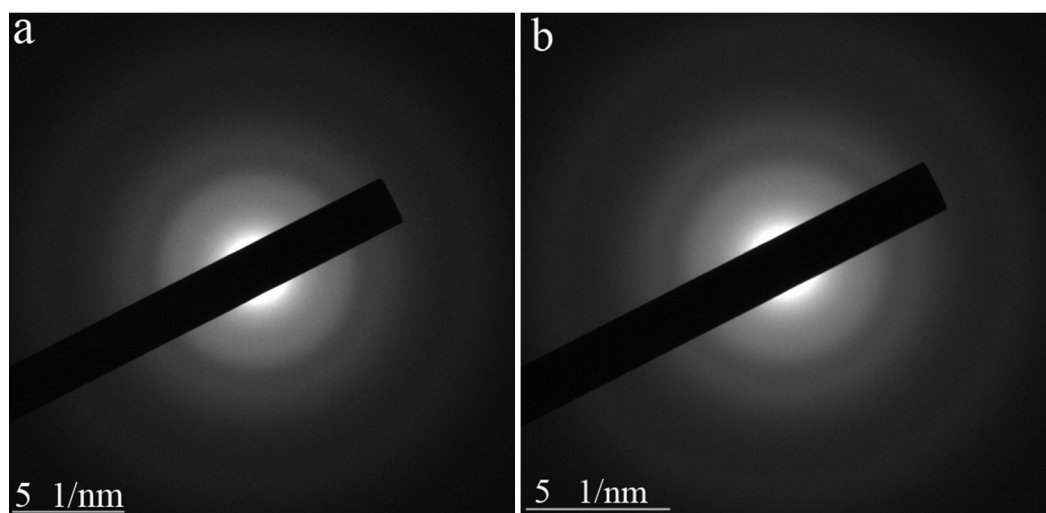

**Figure S4.** Selected area electron diffraction (SAED) images of ATP-Tb CP (a) and ATP-Tb-Phen CP (b).

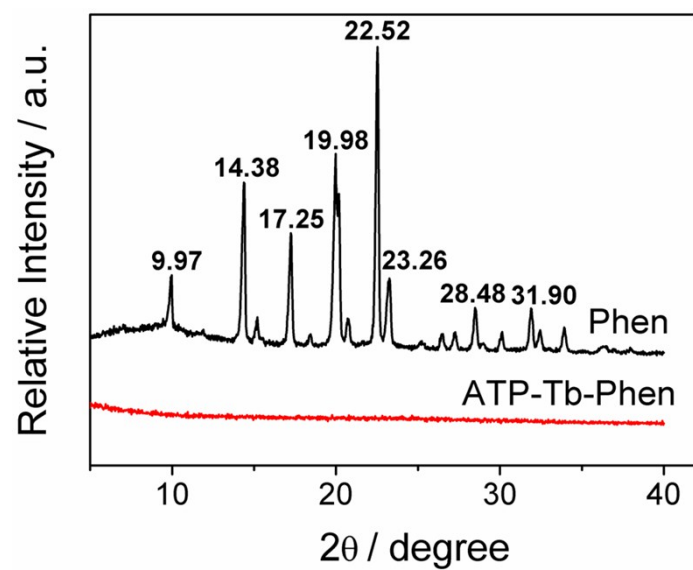

Figure S5. XRD spectra of Phen and ATP-Tb-Phen CP.

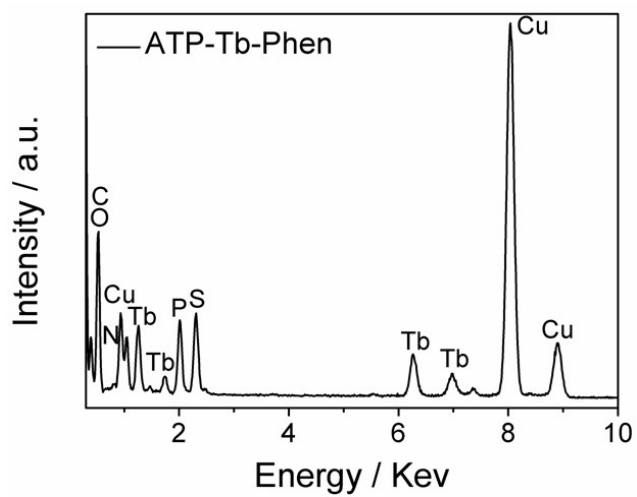

Figure S6. EDX spectra of ATP-Tb-Phen CP.

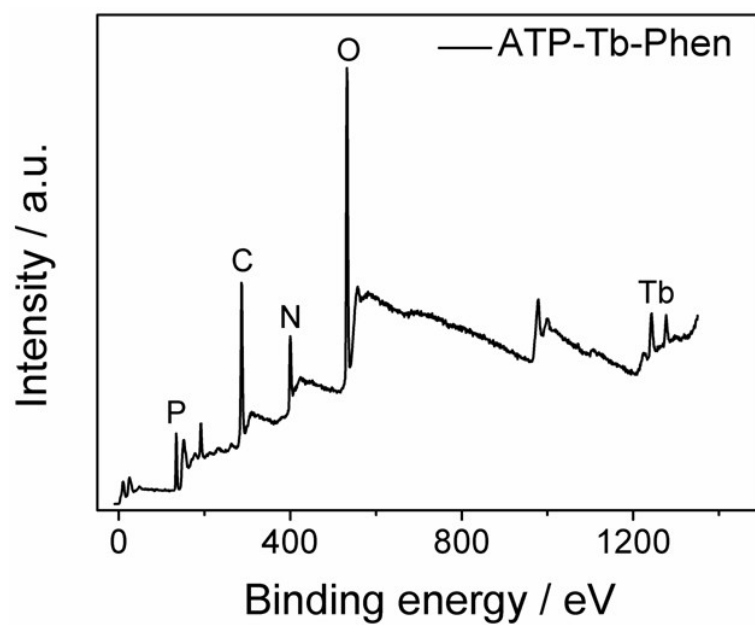

Figure S7. XPS survey scan of ATP-Tb-Phen CP.

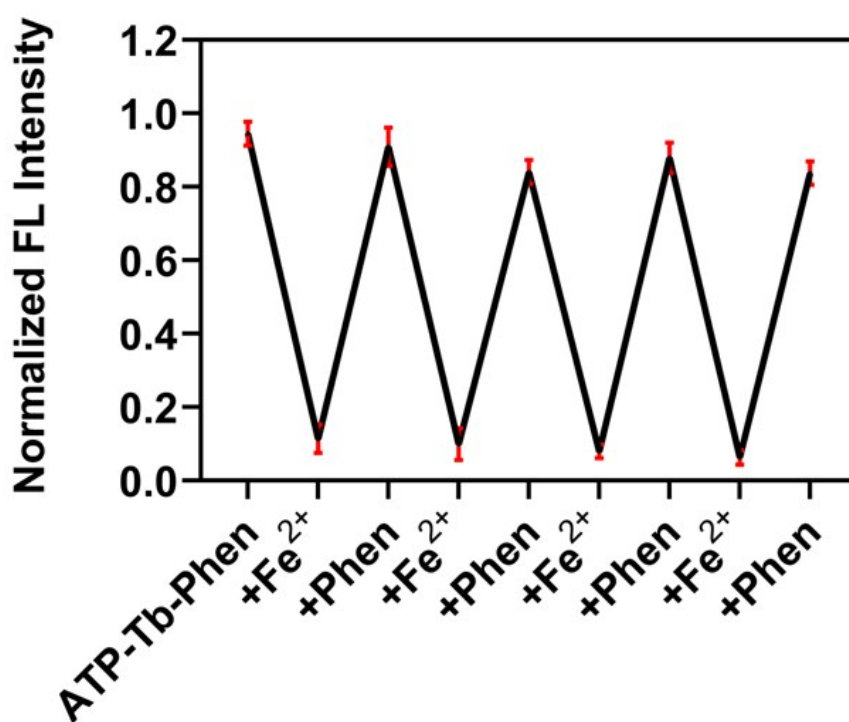

Figure S8. Fluorescence repeatability titrated by Phen and  $\text{Fe}^{2+}$  ions.

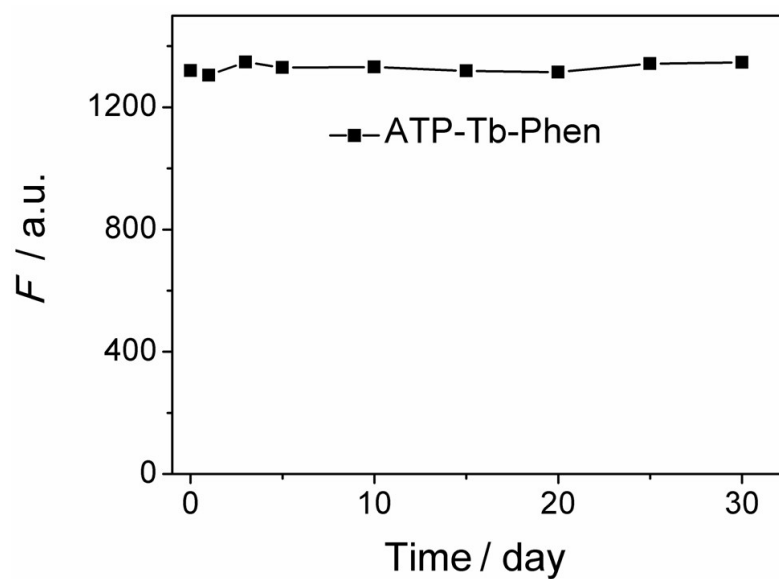

**Figure S9.** Effect of reaction time on luminescence intensity of ATP-Tb-Phen **CP**.

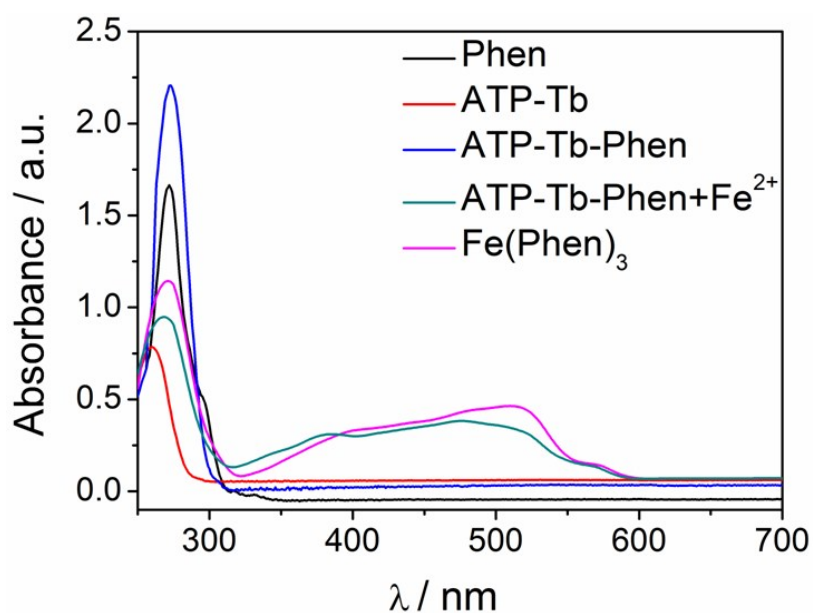

**Figure S10.** UV-vis spectra of ATP-Tb **CP**, ATP-Tb-Phen **CP**, ATP-Tb-Phen **CP** in the presence of  $\text{Fe}^{2+}$  (20  $\mu\text{M}$ ), Phn (40  $\mu\text{M}$ ) and  $\text{Fe}(\text{Phen})_3^{2+}$  complex (20  $\mu\text{M}$ ).

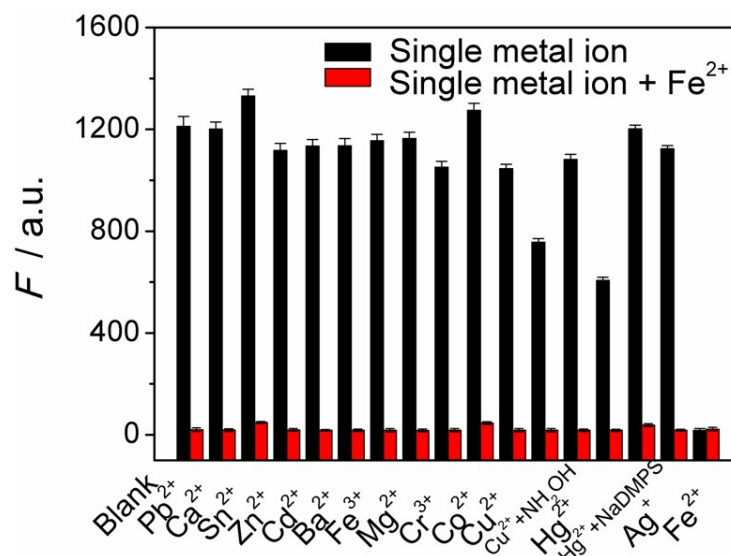

**Figure S11.** Detection selectivity of ATP-Tb-Phen CP in the presence of 15  $\mu$ M various metal ions. Black bars represent the luminescence response after addition of single metal ion (15  $\mu$ M); Red bars represent the luminescence response after addition of single metal ion (15  $\mu$ M) and Fe<sup>2+</sup> (15  $\mu$ M) together.

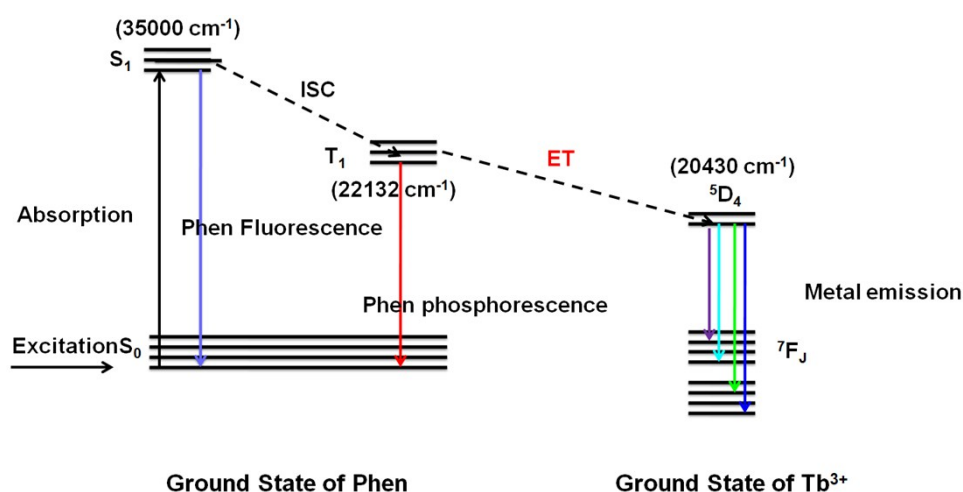

**Scheme S1.** The probable mechanism of intramolecular energy transfer between the ligand (Phen) and the Tb<sup>3+</sup>. ET = energy transfer, ISC = intersystem crossing.
